# Supplementary material for: Synthesis of Ti3+ self-doped TiO2 nanocrystals based on Le Chatelier's principle and their application in solar light photocatalysis
Source: Royal Society of Chemistry journal article supplement (doi:10.1039/c6ra12674j), 2016-01-01
Supplement: c6ra12674j1.pdf [file c6ra12674j1.pdf]

## Electronic Supplementary Information

### **Synthesis of Ti<sup>3+</sup> self-doped TiO<sub>2</sub> nanocrystals based on Le Chatelier's principle and their application in solar light photocatalysis**

Maoqin Qiu<sup>1,2</sup>, Yuan Tian<sup>1,2</sup>, Zhangxian Chen<sup>1,2\*</sup>, Zeheng Yang<sup>1,2\*</sup>, Wenming Li<sup>1,2</sup>, Kai Wang<sup>1,2</sup>, Lei Wang<sup>1,2</sup>, Kun Wang<sup>1,2</sup>, Weixin Zhang<sup>1,2\*</sup>

1 School of Chemistry and Chemical Engineering, Hefei University of Technology, Hefei, China 230009

2 Anhui Key Laboratory of Controllable Chemical Reaction & Material Chemical Engineering, Hefei, China 230009

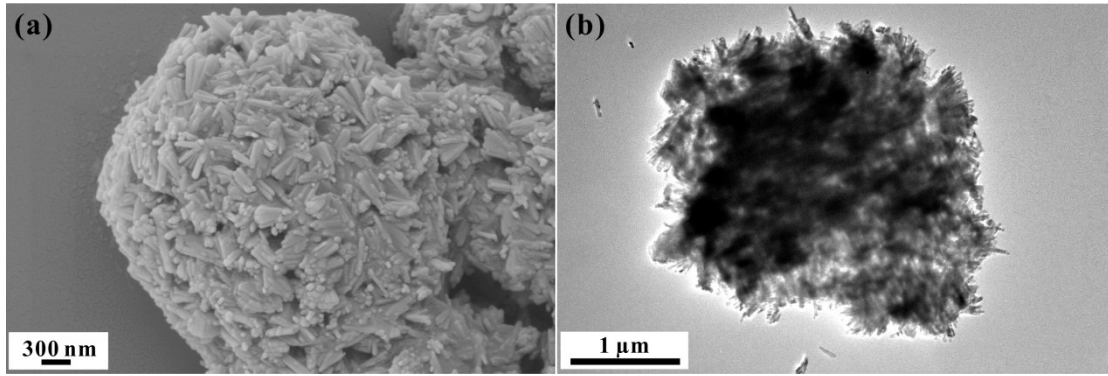

Fig. S1 (a) SEM and (b) TEM images of the pristine TiO<sub>2</sub> (r=0) sample synthesized without using (NH<sub>4</sub>)<sub>2</sub>TiF<sub>6</sub>.

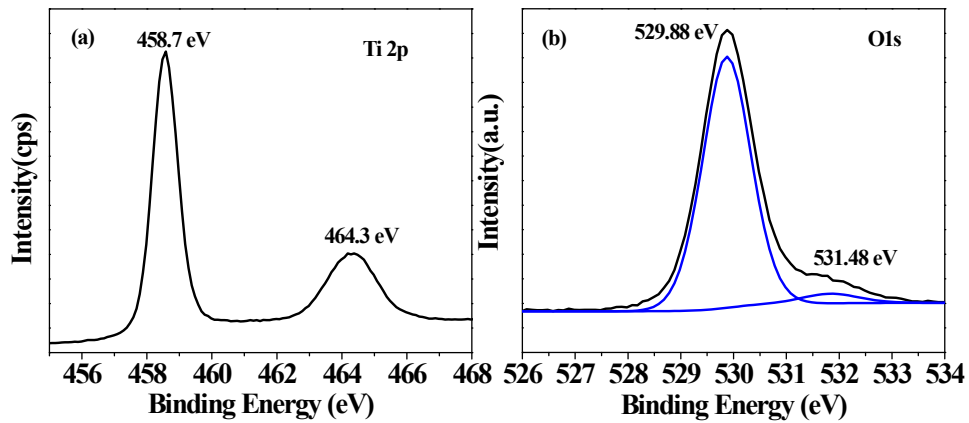

Fig. S2 XPS spectra of Ti2p and O1s for pristine TiO<sub>2</sub> (r=0) sample.

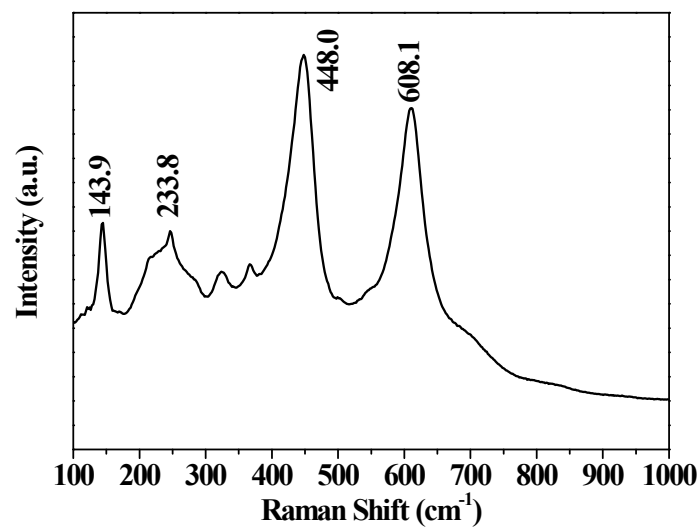

Fig. S3 Raman spectrum of pristine TiO<sub>2</sub> (r=0) sample.

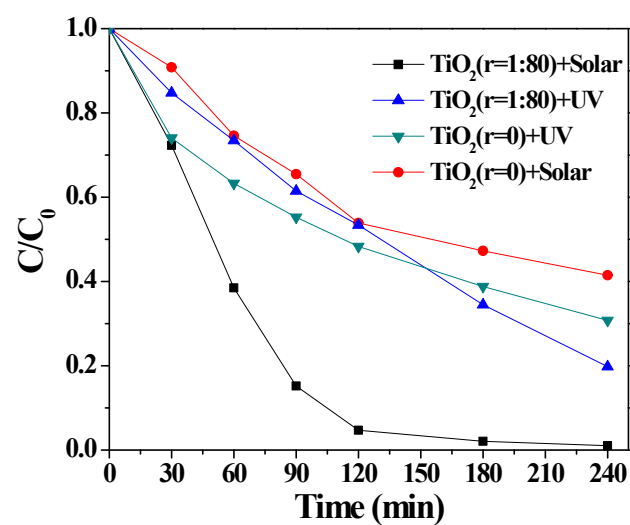

Fig. S4 The relative concentrations of MB solution as a function of irradiation time with different TiO<sub>2</sub> nanocrystals as the photocatalysts under natural solar irradiation and UV irradiation, respectively.

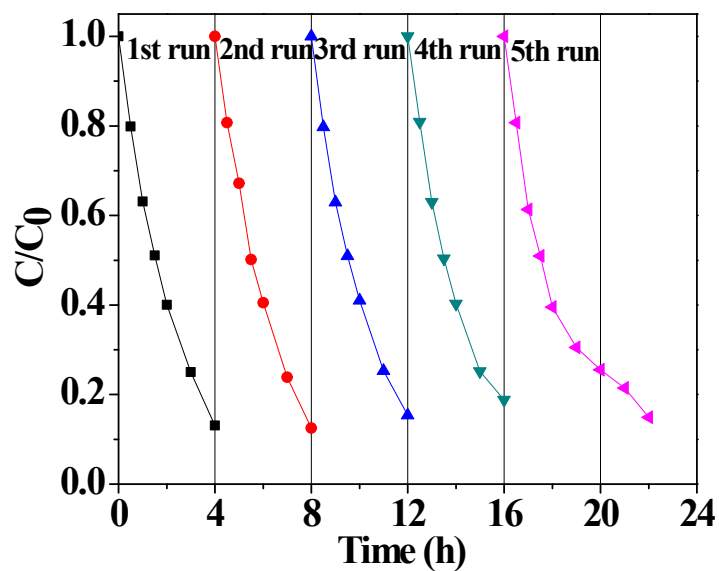

Fig. S5 Life recycle performance of Ti<sup>3+</sup> self-doped TiO<sub>2</sub> nanocrystals (r=1:80) under simulated visible light irradiation.

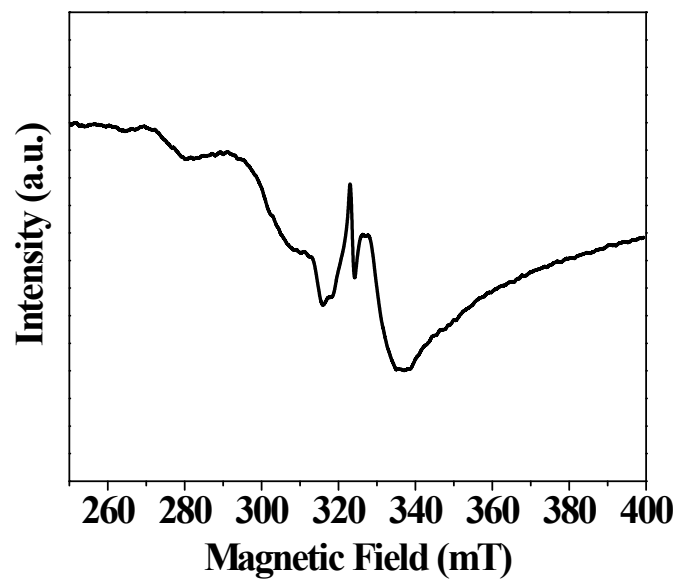

Fig. S6 The EPR spectrum of  $\text{Ti}^{3+}$  self-doped  $\text{TiO}_2$  nanocrystals after fifth run of photocatalytic reactions.
